*Running head:* host nutrition and virus interactions

1 **Host nutrition mediates interactions between plant viruses, altering transmission and**  
2 **predicted disease spread**

3

4 Amy E. Kendig (aekendig@gmail.com)<sup>1,2</sup>, Elizabeth T. Borer (borer@umn.edu)<sup>1</sup>, Emily N.

5 Boak (boakn009@tamu.edu)<sup>1,3</sup>, Tashina C. Picard (picar022@umn.edu)<sup>1</sup>, and Eric W. Seabloom

6 (seabloom@umn.edu)<sup>1</sup>

7

8 Author affiliations:

9 1. Department of Ecology, Evolution, and Behavior, University of Minnesota, St. Paul, MN

10 55108, USA.

11 2. Present address: Agronomy Department, University of Florida, Gainesville, FL 32611, USA.

12 3. Present address: Department of Horticultural Sciences, Texas A&M University, College

13 Station, TX 77843, USA.

14

15 Corresponding author: Amy Kendig, aekendig@gmail.com

16

17  
18  
19  
20  
21  
22  
23  
24  
25  
26  
27  
28  
29  
30  
31  
32  
33  
34  
35  
36  
37  
38  
39

## Abstract

Interactions among co-infecting pathogens are common across host taxa and can affect infectious disease dynamics. Host nutrition can mediate these among-pathogen interactions, altering the establishment and growth of pathogens within hosts. It is unclear, however, how nutrition-mediated among-pathogen interactions affect transmission and the spread of disease through populations. We manipulated the nitrogen (N) and phosphorus (P) supplies to oat plants in growth chambers and evaluated interactions between two aphid-vectored Barley and Cereal Yellow Dwarf Viruses: PAV and RPV. We quantified the effect of each virus on the other's establishment, within-plant density, and transmission. Co-inoculation significantly increased PAV density when N and P supplies were low and tended to increase RPV density when N supply was high. Co-infection increased PAV transmission when N and P supplies were low and tended to increase RPV transmission when N supply was high. Despite the parallels between the effects of among-pathogen interactions on density and transmission, changes in virus density only partially explained changes in transmission, suggesting that virus density-independent processes contribute to transmission. A mathematical model describing the spread of two viruses through a plant population, parameterized with empirically derived transmission values, demonstrated that nutrition-mediated among-pathogen interactions could affect disease spread. Interactions that altered transmission through virus density-independent processes determined overall disease dynamics. Our work suggests that host nutrition alters disease spread through among-pathogen interactions that modify transmission.

**Key words:** co-infection, transmission, within-host, disease spread, barley and cereal yellow dwarf viruses, *Avena sativa*, nitrogen, phosphorus, *Rhopalosiphum padi*

40

## Introduction

41 Resource supply can alter the outcome of species interactions (Tilman 1977, Maestre and  
42 Cortina 2004). A rich body of theoretical and empirical literature has explored the effects of  
43 resource supply on ecological dynamics, but most has focused on free-living organisms (Bruno  
44 et al. 2003, Miller et al. 2005). The nutrients consumed by hosts (i.e., host nutrition) are  
45 important mediators of resource supply to assemblages of pathogens and other symbionts (Smith  
46 et al. 2005). Host nutrition can affect interactions among pathogens that co-infect plant or animal  
47 hosts (Lacroix et al. 2014, Lange et al. 2014, Budischak et al. 2015, Wale et al. 2017)—  
48 interactions that can influence host survival, transmission between hosts, and evolution of  
49 virulence (Vasco et al. 2007, Tollenaere et al. 2016). Therefore, host nutrition may affect  
50 infectious disease dynamics by altering among-pathogen interactions.

51 Among-pathogen interactions can have positive, neutral, or negative effects on within-  
52 host pathogen fitness (Moreno and López-Moya 2020). Competition among pathogens for  
53 limiting resources, such as nutrients, cells, or tissues, can suppress pathogen densities (Smith and  
54 Holt 1996, Pedersen and Fenton 2007). Host nutrition that affects the supply of pathogen-  
55 limiting resources can alter the outcome of pathogen competition (Wale et al. 2017). Pathogens  
56 also can interact indirectly by promoting or suppressing host immune reactions (Pedersen and  
57 Fenton 2007, Vasco et al. 2007). Immune functioning in mammals depends on vitamins, zinc,  
58 iron, and iodine (Katona and Katona-Apte 2008), and plant susceptibility to infection can depend  
59 on nitrogen (N), phosphorus (P), and potassium (K) in the soil (Dordas 2009). It follows that host  
60 nutrition also can affect immune-mediated pathogen interactions (Budischak et al. 2015).

61 Interactions among pathogens can affect disease spread when there is a strong  
62 relationship between within-host pathogen density and processes that affect host population

63 dynamics, including transmission, mortality, and recovery (Mideo et al. 2008, Handel and  
64 Rohani 2015). Pathogens that reach higher densities within hosts are more likely to produce  
65 more propagules for transmission (McCallum et al. 2017). Interactions among pathogens within  
66 plants and animals alter transmission and the proportion of the population that becomes infected  
67 (Ezenwa and Jolles 2011, Susi et al. 2015a, Halliday et al. 2017). Yet, it is unclear how the  
68 impacts of host nutrition on among-pathogen interactions affect disease spread. Nutrition-  
69 mediated interactions within the host are likely to influence disease spread if a strong  
70 relationship between within-host pathogen density and a process that affects host population  
71 dynamics (e.g., transmission) exists (Gilchrist and Coombs 2006, Strauss et al. 2019).

72         Increases in within-host pathogen densities do not always increase the probability of  
73 transmission (Handel and Rohani 2015, McCallum et al. 2017). For example, the relationship  
74 between pathogen density and transmission is sigmoidal for malaria-inducing *Plasmodium*  
75 *falciparum*, and increases in *P. falciparum* density beyond a threshold do not affect transmission  
76 (Alizon and van Baalen 2008). Such non-linearities can arise when vector behavior and  
77 pathogen-vector interactions affect the probability of transmission (Gray et al. 1991), decoupling  
78 transmission from within-host dynamics. Interactions among pathogens also can change  
79 establishment or transmission independently of changes in pathogen density. For example, co-  
80 infection can modify vector preference and the efficacy of vector transmission, causing  
81 transmission from co-infected hosts to differ from singly infected hosts (Rochow et al. 1983,  
82 Srinivasan and Alvarez 2007). Therefore, nutrition-mediated among-pathogen interactions may  
83 modify disease spread through processes that are independent of within-host density.

84         Here we experimentally tested the effects of host nutrition on among-pathogen  
85 interactions and transmission using a well-studied group of aphid-transmitted viruses that infect

86 crops and wild plants: the Barley and Cereal Yellow Dwarf Viruses (B/CYDVs; Power et al.  
87 2011). In a growth chamber experiment, we manipulated soil N and P concentrations supplied to  
88 oat plants singly- and co-inoculated with two B/CYDVs: BYDV-PAV (PAV, hereafter) and  
89 CYDV-RPV (RPV, hereafter). We quantified the effects of interactions between the viruses by  
90 measuring establishment, within-plant virus densities, and transmission to new plants (Fig. 1).  
91 Then, we used empirically estimated transmission values to parameterize a mathematical model  
92 with the goal of predicting the effects of host nutrition-mediated among-pathogen interactions on  
93 disease spread. We used this experiment and model to address the following questions.

94 *Question 1: Does host nutrition affect among-pathogen interactions within hosts?*

95 Results from previous studies indicate that host nutrition mediates B/CYDV replication  
96 and among-pathogen interactions (Lacroix et al. 2014, Whitaker et al. 2015). However, it is  
97 unclear whether previously observed reductions in RPV infection prevalence due to co-  
98 inoculation with PAV (Lacroix et al. 2014) represent interactions that allow establishment, but  
99 suppress RPV density below detection thresholds over time, or that interfere with establishment.  
100 These two outcomes of PAV–RPV interactions could have different effects on host health and  
101 RPV transmission. Time series of virus densities can help clarify when among-pathogen  
102 interactions occur. We used a full factorial combination of high and low N and P supply rates to  
103 evaluate how host nutrition affected the nature (i.e., positive, neutral, negative) and timing (i.e.,  
104 early or late relative to inoculation) of interactions between B/CYDVs within plants. While this  
105 experimental design allowed us to test whether co-inoculation altered establishment or post-  
106 establishment processes, it did not allow us to fully discern the mechanisms behind observed  
107 among-pathogen interactions (e.g., resource competition, immune-mediated interactions).

108 *Question 2: Does host nutrition modify among-pathogen interactions to affect transmission?*

109 Because insect-vectored viruses with higher within-plant densities often have higher  
110 transmission (Froissart et al. 2010), among-pathogen interactions that promote (suppress) virus  
111 density are expected to promote (suppress) transmission. Virus density–transmission  
112 relationships, however, may be virus-specific (Gray et al. 1991). In addition, the impacts of co-  
113 infection on vector acquisition may affect transmission independently of virus density (Rochow  
114 et al. 1983, Wen and Lister 1991). We evaluated the effects of virus density, host nutrition, and  
115 co-infection on transmission from source plants (i.e., those inoculated in *Question 1*) to recipient  
116 plants grown with a full factorial combination of low and high N and P supply rates.

117 *Question 3: Can nutrition-mediated among-pathogen interactions affect disease spread?*

118 Higher transmission can increase the rate of disease spread through a population. Thus,  
119 changes in transmission due to host nutrition-mediated among-pathogen interactions are  
120 expected to have population-level consequences. Nutrient additions have altered B/CYDV  
121 infection prevalence in wild grass populations (Seabloom et al. 2013, Borer et al. 2014), but it is  
122 unclear whether these changes were mediated by within-plant dynamics. We parameterized a  
123 two-pathogen compartmental model with our empirical results to quantify the effects of  
124 nutrition-mediated among-pathogen interactions on infection prevalence over time. We then used  
125 the model to evaluate the contribution of within-plant virus density to disease dynamics.

## 126 **Methods**

### 127 *Study system*

128 The B/CYDV group consists of single-stranded RNA viruses in the *Luteoviridae* family  
129 that can infect over 100 species of *Poaceae* and are persistently transmitted by several aphid  
130 species (Power et al. 2011). The aphid *Rhopalosiphum padi* is an effective vector of the two  
131 virus species we used in this study, PAV and RPV (Gray et al. 1991, Power et al. 2011). We

132 maintained cultures of PAV and RPV in *Avena sativa* L. cv. Coast Black Oat (National plant  
133 germplasm system, USDA) by periodically feeding infected plant tissue to *R. padi* aphids, which  
134 were temporarily transferred to uninfected *A. sativa*. *Rhopalosiphum padi* colonies were  
135 maintained on uninfected *A. sativa* plants. We obtained the virus isolates from Dr. Stewart Gray  
136 at Cornell University (Ithaca, NY, USA), and the aphids from Dr. George Heimpel at the  
137 University of Minnesota (St. Paul, MN, USA), who each collected these organisms in their  
138 respective states. Uninfected plants, infected plants, and plants with *R. padi* were grown in  
139 Sunshine MVP potting soil (Sun Gro Horticulture, Agawam, MA, USA) and kept in separate  
140 growth chambers at 20°C with a 16:8 h light:dark cycle for one year prior to the experiment.

#### 141 *Experimental design*

142 The experiment was carried out from February to August 2014 over five temporal blocks.  
143 *Avena sativa* seeds were germinated in 164 mL conical pots with 70% Sunshine medium  
144 vermiculite (vermiculite and <1% crystalline silica; Sun Gro Horticulture) and 30% Turface  
145 MVP (calcined clay containing up to 30% crystalline silica; Turface Athletics, Buffalo Grove,  
146 IL, USA) that had been saturated with tap water. Beginning two days after planting, we watered  
147 each plant with one of the following modified Hoagland solutions (i.e., nutrient treatments,  
148 Appendix S1: Table S1, Hoagland and Arnon 1938): 7.5 µM N and 1 µM P (“Low”), 7.5 µM N  
149 and 50 µM P (“P”), 375 µM N and 1 µM P (“N”), or 375 µM N and 50 µM P (“N+P”), which  
150 differentially affect plant growth and B/CYDV infection prevalence (Seabloom et al. 2011,  
151 Lacroix et al. 2014, 2017). Plants were watered with 30 mL of nutrient solution twice per week  
152 prior to inoculation and weekly following inoculation. After inoculation, plants were moved to a  
153 growth chamber maintained at 20°C with a 16:8 h light:dark cycle under 28W bulbs.

154 We inoculated the plants used to assess pathogen establishment and density (*Question 1*)

155 10 to 11 days post planting with PAV, RPV, or both (Fig. 1a). Aphids fed on virus culture leaves  
156 for approximately two days and then were combined into plastic containers by inoculation type.  
157 We attached one mesh cage to each plant on the largest leaf and placed ten aphids in each mesh  
158 cage, allowing them to feed on the plants for approximately four days. PAV inoculations  
159 involved five aphids that fed on PAV-inoculated culture leaves and five that fed on uninfected  
160 leaves, RPV inoculations involved five aphids that fed on RPV-inoculated culture leaves and five  
161 that fed on uninfected leaves, co-inoculations involved five aphids that fed on PAV-inoculated  
162 culture leaves and five that fed on RPV-inoculated culture leaves (Appendix S1).

163 We destructively harvested the experimental plants at eight days post inoculation (DPI):  
164 5, 8, 12, 16, 19, 22, 26, or 29 days. We cut the stems and leaves into small pieces using a  
165 sterilized blade, weighed them, stored about 60% of the tissue at -80°C for reverse transcription-  
166 quantitative polymerase chain reaction (RT-qPCR, see *Quantifying virus density*), and used the  
167 remainder to measure transmission (Fig. 1b). Unique combinations of nutrient treatments ( $n = 4$ ),  
168 inoculation treatments ( $n = 3$ ), and harvesting days ( $n = 8$ ) resulted in 96 treatments. Each  
169 treatment was replicated twice in block one, once in blocks two through four, and zero to two  
170 times in block five, depending on losses in earlier blocks (Appendix S1: Table S2).

171 During blocks 1–4, approximately 40% of the tissue from the *Question 1* plants (i.e.,  
172 “source plants”) was used to measure transmission to four “recipient plants” grown in each of the  
173 four nutrient treatments (*Question 2*, Fig. 1d). Source plant tissue was placed in glass tubes with  
174 25 aphids for about two days. Then, five aphids, contained in a mesh cage affixed to the largest  
175 leaf of each recipient plant, fed for about four days (Appendix S1). The recipient plants were  
176 harvested 14 to 15 DPI and all of the stem and leaf tissue was stored at -80°C for RT-PCR and  
177 gel electrophoresis, which detects whether plants were infected with either virus (Appendix S1).



178 *Quantifying virus density*

179 To quantify virus densities—number of viruses per milligram plant—in source plants, we  
180 first extracted the total RNA from ~50 mg of thawed plant tissue (Appendix S1, Fig. 1c). We  
181 used one-step RT-qPCR to obtain the concentration of genomic RNA copies per volume of total  
182 RNA extract (Appendix S1). The RNA regions targeted for RT-qPCR, which are specific to  
183 PAV and RPV, encode coat proteins (Appendix S1: Table S3). We assumed that the genomic  
184 RNA copies measured by RT-qPCR approximated the number of virus particles in a sample and  
185 used the total amount of plant tissue extracted to estimate the concentration of viruses in 1 mg of  
186 plant tissue (Mackay et al. 2002, Lacroix et al. 2017). Virus densities that were large enough to  
187 be quantified by RT-qPCR were considered indicators of virus establishment. Plants with  
188 unintended infections (i.e., PAV detected in RPV-inoculated plants and RPV detected in PAV-  
189 inoculated plants, Appendix S1: Table S2) were excluded from analyses to generate conservative  
190 estimates. Such infections may have been caused by aphids that escaped inoculation cages or a  
191 small number of unintended infections in the virus culture leaves (Appendix S1).

192 *Statistical analysis*

193 We performed all statistical analyses in R version 3.5.2 (R Core Team 2018), using the  
194 brms package (Bürkner 2017) to fit Bayesian linear regressions to data for each virus species. To  
195 evaluate virus establishment (*Question 1*), we fit a generalized linear regression with a Bernoulli  
196 response distribution (logit-link) to the proportion of plants that tested positive for infection  
197 based on RT-qPCR. To evaluate virus density in plants with infection (*Question 1*), we fit a  
198 normal linear regression to log-transformed virus density. In both cases, the predictor variables  
199 were a three-way interaction among the binary variables co-inoculation, N addition, and P  
200 addition (Appendix S2: Table S1). A first-order autocorrelation structure was used to account for

201 correlations between virus density values on consecutive harvesting days. In the virus  
202 establishment models, harvesting day was included as a random intercept, which accounts for  
203 variation among harvesting days (autocorrelation structures were not compatible with this type of  
204 model). Experimental block was not included as a random intercept in either model because it  
205 explained minimal variation. We evaluated transmission (proportion of recipient plants infected,  
206 *Question 2*) using a generalized linear model with a Bernoulli response distribution (logit-link):

$$207 \quad \begin{aligned} & \text{transmission} \sim \text{virus density} \times (N_{\text{source}} \times P_{\text{source}} + N_{\text{recipient}} \times P_{\text{recipient}}) + \\ & \text{coinfection} \times (N_{\text{source}} \times P_{\text{source}} + N_{\text{recipient}} \times P_{\text{recipient}}) \end{aligned} \quad (1)$$

208 Subscripts indicate which plant the nutrient treatment was applied to and virus density was  
209 centered and scaled. Redundant main effects and interactions were omitted. Note that “co-  
210 infection” describes the status of the plant while “co-inoculation” describes the experimental  
211 treatment. Harvesting day and experimental block were included as crossed random intercepts.  
212 We used data from an experiment that measured PAV and RPV densities and transmission under  
213 similar conditions to inform some of the priors for the density and transmission models (Lacroix  
214 et al. 2017); uninformative priors were used otherwise (Appendix S2: Table S1). All models  
215 were run with three Markov chains, 6000 iterations each with a 1000 iteration warm-up. We  
216 evaluated model fit with r-hat values and visual comparisons of the observed data and simulated  
217 data from the posterior predictive distributions. We present the estimated effect sizes from  
218 models with informative priors, which were similar to models without informative priors  
219 (Appendix S2: Fig. S1). We report results as statistically significant if the 95% credible interval  
220 (CI; the interval that contains the most probable estimate values) omits the value representing  
221 “no effect” (i.e., zero for normal distribution or one for Bernoulli distribution).

## 222 *Mathematical model*

223 To evaluate the effects of nutrition-mediated among-pathogen interactions on the spread

224 of B/CYDVs in plant populations, we used our empirical results to parameterize a two-pathogen  
225 compartmental model (Seabloom et al. 2015). In the model, host plants are susceptible ( $S$ ),  
226 infected with PAV ( $I_P$ ), infected with RPV ( $I_R$ ), or co-infected ( $I_C$ ):

$$227 \quad \frac{dS}{dt} = -[\beta_P I_P + \beta_R I_R + q_P \beta_P (1 - q_R \beta_R) I_C + q_R \beta_R (1 - q_P \beta_P) I_C + q_P \beta_P q_R \beta_R I_C] \frac{S}{N} \quad (2)$$

$$228 \quad \frac{dI_P}{dt} = \beta_P [I_P + q_P (1 - q_R \beta_R) I_C] \frac{S}{N} - \beta_R (I_R + q_R I_C) \frac{I_P}{N}$$

$$229 \quad \frac{dI_R}{dt} = \beta_R [I_R + q_R (1 - q_P \beta_P) I_C] \frac{S}{N} - \beta_P (I_P + q_P I_C) \frac{I_R}{N}$$

$$230 \quad \frac{dI_C}{dt} = \beta_P (I_P + q_P I_C) \frac{I_R}{N} + \beta_R (I_R + q_R I_C) \frac{I_P}{N} + q_P \beta_P q_R \beta_R I_C \frac{S}{N}$$

$$231 \quad N(t) = S(t) + I_P(t) + I_R(t) + I_C(t)$$

232 The terms  $\beta_P$  and  $\beta_R$  represent the probability of transmission from plants singly infected with  
233 PAV and RPV, respectively, given vector-assisted contact with another plant. Transmission from  
234 co-infected plants equals transmission from singly infected plants multiplied by a modifier ( $q_P$  or  
235  $q_R$ ), which may represent positive ( $>1$ ) or negative ( $<1$ ) interactions (Appendix S3). We  
236 performed simulations of Eq. 2 over a single growing season (R version 3.5.2, R Core Team  
237 2018) using the deSolve package (Soetaert et al. 2010). We compared simulations with both  
238 viruses present in the system to those with each virus alone. We repeated the simulations with  
239 three sets of parameter values estimated from Eq. 1 (Appendix S3: Table S1) that differ in the  
240 processes by which virus interactions can affect transmission: through changes in virus density,  
241 virus density-independent processes, and both types of processes (Appendix S3: Table S2).  
242 Parameter values for each nutrient treatment were used in separate simulations, restricting  
243 transmission to plants grown with the same nutrient treatment.

244

245

## Results

246

*Question 1: Does host nutrition affect among-pathogen interactions within hosts?*

247

Nutrient addition and co-inoculation did not significantly affect PAV or RPV

248

establishment (the proportion of plants infected; Appendix S2: Table S1). Co-inoculation had the

249

strongest effects on PAV establishment when plants were grown with low nutrients (-29%, Fig.

250

2c) and RPV establishment when plants were grown with elevated N (+7%, Fig. 2d).

251

Nutrient addition and co-inoculation did not significantly affect RPV density (viruses per

252

mg plant tissue; Table 1). Co-inoculation had the strongest effect on RPV density when plants

253

were grown with elevated N (+105%, Fig. 2h). This positive effect was relatively consistent

254

following the first two harvesting days (Fig. 2f). Co-inoculation significantly increased PAV

255

density 98% when plants were grown with low nutrients (Fig. 2g, Table 1), which was more

256

evident later in the course of infection (Fig. 2e).

257

*Question 2: Does host nutrition modify among-pathogen interactions to affect transmission?*

258

Host nutrition modified the relationships between virus density and transmission

259

(proportion of recipient plants infected; Table 2). RPV density significantly increased

260

transmission when recipient plants were grown with elevated N and P (Fig. 3d). PAV displayed a

261

similar trend (Fig. 3c). PAV density significantly decreased transmission when recipient plants

262

were grown with elevated P (Fig. 3c); a trend also observed for RPV (Fig. 3d).

263

Consistent with the results for PAV density (Fig. 2g), co-infection significantly increased

264

PAV transmission 43% when source plants were grown with low nutrients and recipient plants

265

were grown with elevated P (Fig. 3e, Table 2). However, PAV density reduced transmission

266

under these conditions (Fig. 3c) and co-infection increased PAV transmission 93% when density

267

was held constant (i.e., the difference in transmission at the vertical dotted line on Fig. 3c). Co-

268 infection significantly reduced PAV transmission 26% from plants grown with elevated N to  
269 plants grown with low nutrients, with stronger effects when density was held constant (-38%,  
270 Fig. 3e). Nitrogen addition to recipient plants significantly increased RPV transmission 26%  
271 (source plants grown with low nutrients; Fig. 3f). Co-infection did not significantly affect RPV  
272 transmission, increasing it the most when source plants were grown with elevated N and  
273 recipient plants were grown with low nutrients (14%, Fig. 3f). This result is consistent with the  
274 positive effect of co-inoculation on RPV density (Fig. 2h), but co-infection still increased  
275 transmission 14% when density was held constant.

276 *Question 3: Can nutrition-mediated among-pathogen interactions affect disease spread?*

277 Simulations from the mathematical model (Eq. 2) suggest that RPV can increase PAV  
278 infection prevalence in plant populations grown with elevated P and decrease PAV prevalence  
279 with the addition of N or both nutrients (Fig. 4a). These effects are driven by among-pathogen  
280 interactions that do not act on transmission through changes in virus density (i.e., density-  
281 independent, Fig. 4c). In fact, interactions with RPV that alter PAV density increase PAV  
282 infection prevalence with N addition (Fig. 4b). Simulations suggest that PAV can increase RPV  
283 infection prevalence with N addition and decrease RPV infection prevalence when plants are  
284 grown with low nutrients (Fig. 4d). Again, these effects are driven by virus density-independent  
285 processes (Fig. 4f) and changes in density due to among-pathogen interactions have some  
286 opposite effects (Fig. 4e). The predicted effects begin about midway through the growing season  
287 and later decline as all plants in the population become infected (Appendix S3: Fig. S1).

## 288 **Discussion**

289 The results from this experiment are consistent with findings from previous studies across  
290 host taxa: host nutrition can mediate within-host interactions among pathogens (Lacroix et al.

291 2014, Lange et al. 2014, Budischak et al. 2015, Wale et al. 2017). We built upon this work to  
292 demonstrate that host nutrition and among-pathogen interactions can alter transmission, and  
293 potentially disease spread. In particular, plant viruses can promote one another's within-host  
294 densities under specific host nutrition conditions (*Question 1*). The viruses had positive,  
295 negative, and neutral effects on one another's transmission, which also varied with host nutrition  
296 (*Question 2*). A mathematical model parameterized with these experimental results suggests that  
297 interactions between viruses that alter transmission directly—as opposed to indirectly through  
298 changes in density—will affect disease spread in a population (*Question 3*).

299 *The effects of host nutrition on among-pathogen interactions within the host*

300 Changes in host nutrition shifted among-pathogen interactions from neutral to positive.  
301 With low nutrients, co-inoculation slowed the establishment of PAV, but ultimately promoted  
302 PAV density. In contrast, co-inoculation had limited effects on PAV with elevated N and P  
303 supplies. Co-inoculation increased RPV density with N addition. These results suggest that N  
304 and P supplied to grasses through fertilization, atmospheric deposition, and other processes, may  
305 alter the strength of interactions between viruses co-occurring within hosts. We used previous  
306 studies on nutrition-mediated PAV and RPV interactions to inform the priors of our statistical  
307 models. In the previous studies, elevated N alleviated a negative effect of co-inoculation on RPV  
308 establishment, but host nutrition did not mediate the effects of co-inoculation on virus density  
309 (Lacroix et al. 2014, 2017). We also found that N addition led to a more positive effect of co-  
310 inoculation on RPV. Our result that co-inoculation increased PAV density with low nutrient  
311 supply provided a novel insight into our understanding of among-pathogen interactions.

312 Our work is consistent with previous studies that have shown that B/CYDVs, like other  
313 plant viruses, can have positive effects on one another. Although it is not yet known how PAV

314 and RPV apparently facilitate each other, there are at least two potential explanations. Plant  
315 viruses can use proteins produced by other virus species, which may facilitate transmission and  
316 movement through the plant (Wen and Lister 1991, Moreno and López-Moya 2020). Different  
317 plant viruses also can interfere with host immunity using distinct mechanisms (Liu et al. 2012).  
318 Complementarity in host immunosuppression may increase virus density (Moreno and López-  
319 Moya 2020). Both mechanisms—sharing resources and complementary immunosuppression—  
320 may be mediated by host nutrition (Smith et al. 2005, Budischak et al. 2015).

321 *The effects of nutrition-mediated among-pathogen interactions on transmission*

322 Host nutrition mediated the size and direction of the effects of among-pathogen  
323 interactions on transmission. Although the positive effects of co-infection on transmission  
324 occurred under the same nutrient treatments as positive effects of co-inoculation on density,  
325 higher virus density did not explain increased transmission. In fact, the relationship between  
326 virus density and transmission was variable for both viruses. This results is similar to a field  
327 experiment manipulating plant fungal infection in which plants with more infected leaves did not  
328 consistently produce more fungal spores (Susi et al. 2015b). Also, the density-transmission  
329 relationship depended upon host nutrition, a result that is parallel to nutrition effects on aphid  
330 endosymbionts (Wilkinson et al. 2007), suggesting that these interdependencies may be general.

331 A range of factors other than within-host pathogen density can affect transmission  
332 (McCallum et al. 2017). B/CYDV transmission depends on virus-vector and host-vector  
333 interactions (Rochow et al. 1983, Gray et al. 1991, Wen and Lister 1991). Highly relevant to our  
334 results are the findings that plant nutrient content and infection status affect aphid feeding  
335 preferences (Srinivasan and Alvarez 2007, Nowak and Komor 2010) and that the time aphids  
336 spend feeding on plants can affect transmission (Gray et al. 1991). While we partially controlled

337 for aphid preference by placing aphids in cages, we do not know how long aphids fed on each  
338 plant. Thus, observed changes in transmission due to host nutrition and co-infection may have  
339 arisen through variation in aphid feeding times. In this case, the presence of one pathogen can  
340 affect the fitness and prevalence of the other (i.e., an “among-pathogen interaction”), despite the  
341 absence of relevant changes in within-host density.

342 *The implications of host nutrition-mediated among-pathogen interactions for disease spread*

343 A mathematical model parameterized with empirical transmission values demonstrated  
344 that nutrition-mediated among-pathogen interactions may affect infection prevalence in plant  
345 populations and highlighted the importance of virus density-independent processes in  
346 transmission. The result that changes in within-host virus density due to nutrition-mediated  
347 among-pathogen interactions are unlikely to affect infectious disease dynamics in host  
348 populations is consistent with research in animal populations demonstrating that nutrients can  
349 influence infection prevalence through transmission processes that are independent of within-  
350 host pathogen density, such as contact between susceptible and infectious hosts (Becker et al.  
351 2015). Evaluating the relative effects of within-host dynamics and other transmission-related  
352 processes on infectious disease dynamics is an important goal of disease ecology, especially  
353 considering the complexity that within-host dynamics can add to empirical and theoretical  
354 studies (Mideo et al. 2008, Handel and Rohani 2015, Susi et al. 2015b).

355 Nonetheless, some of the predictions of the model were not apparently consistent with  
356 previous work. In two separate field experiments, P addition, but not N addition, increased PAV  
357 prevalence, and in one experiment, neither nutrient affected RPV prevalence (Seabloom et al.  
358 2013, Borer et al. 2014). Our model predicted that P addition would reduce PAV prevalence,  
359 despite positive effects of co-infection under this condition. Both N and P were predicted to



360 increase RPV prevalence. The effects of co-infection and host nutrition on aphid preference,  
361 aphid population growth, and other factors affecting transmission that were not measured in this  
362 experiment may explain the gap between model predictions and field experiment results.  
363 Experiments examining such processes (e.g., Srinivasan and Alvarez 2007, Nowak and Komor  
364 2010) could be paired with more detailed models (e.g., Strauss et al. 2019) to further explore the  
365 implications of nutrition-mediated among-pathogen interactions for infectious disease dynamics.

#### 366 *Limitations of this study*

367 We observed high uncertainty around estimates of establishment, pathogen density, and  
368 transmission, which may result from variation in host-pathogen interactions across individuals  
369 (de Roode et al. 2004). This variation could be amplified in our dataset if it is more apparent  
370 when viruses reach higher densities: the lower detection threshold of our RT-qPCR protocol  
371 (about 150 viruses per mg plant) limited our ability to accurately quantify samples with low virus  
372 densities, leading to their removal from density and transmission analyses. In addition, we  
373 conducted simultaneous inoculations of PAV and RPV, but the sequence and timing of  
374 inoculations can affect the outcome of pathogen interactions (Clay et al. 2018). Host nutrition  
375 may have different effects on pathogen interactions depending on inoculation sequence and  
376 timing. Nonetheless, our results do empirically demonstrate that a host's nutritional environment  
377 can alter among-pathogen interactions, transmission, and disease spread.

#### 378 *Conclusions*

379 This study demonstrates that host nutrition may alter infectious disease dynamics through  
380 among-pathogen interactions. Influential nutrition-mediated among-pathogen interactions  
381 manifested as changes in transmission that were independent of within-host pathogen density.  
382 Therefore, the development of a more comprehensive, predictive framework for the role of co-

383 infection in disease transmission and infectious dynamics would benefit from investigations of  
384 host nutrition effects on virus-vector and host-vector interactions (Rochow et al. 1983, Nowak  
385 and Komor 2010). Co-infection of hosts is common in natural systems (Tollenaere et al. 2016),  
386 where host nutrition is altered by intentional and unintentional nutrient inputs (Smith et al. 2005).  
387 Overall, the results from this study suggest that nutrient inputs into terrestrial plant systems are  
388 likely to affect interactions between co-occurring viruses, leading to shifts in disease spread.

### 389 **Acknowledgements**

390 We are grateful to Christelle Lacroix, Melissa Rudeen, Anita Krause, Nicholas Cupery,  
391 Casey Easterday, Kurra Renner, Luc Robichaud, and Alexis Rogers for help with the experiment  
392 and to multiple anonymous reviewers for their comments on earlier drafts. AEK was supported  
393 by an NSF IGERT graduate fellowship at the University of Minnesota (DGE-0653827) and an  
394 NSF Graduate Research Fellowship (base award number 006595) and ETB and EWS received  
395 support from the NSF program in Ecology and Evolution of Infectious Diseases (grant DEB-  
396 1015805). AEK, ETB, and EWS designed the experiment, AEK, ENB, and TCP performed the  
397 experiment and analyses, AEK wrote the first draft, and all authors contributed to revisions.

### 398 **Literature cited**

399 Alizon, S., and M. van Baalen. 2008. Transmission-virulence trade-offs in vector-borne diseases.  
400 *Theoretical Population Biology* 74:6–15.  
401 Becker, D. J., D. G. Streicker, and S. Altizer. 2015. Linking anthropogenic resources to wildlife-  
402 pathogen dynamics: A review and meta-analysis. *Ecology Letters* 18:483–495.  
403 Borer, E. T., E. W. Seabloom, C. E. Mitchell, and J. P. Cronin. 2014. Multiple nutrients and  
404 herbivores interact to govern diversity, productivity, composition, and infection in a  
405 successional grassland. *Oikos* 123:214–224.

- 406 Bruno, J. F., J. J. Stachowicz, and M. D. Bertness. 2003. Inclusion of facilitation into ecological  
407 theory. *Trends in Ecology and Evolution* 18:119–125.
- 408 Budischak, S. A., K. Sakamoto, L. C. Megow, K. R. Cummings, J. F. Urban, and V. O. Ezenwa.  
409 2015. Resource limitation alters the consequences of co-infection for both hosts and  
410 parasites. *International Journal for Parasitology* 45:455–463.
- 411 Bürkner, P.-C. 2017. brms: An R package for Bayesian multilevel models using Stan. *Journal of*  
412 *Statistical Software* 80:1–28.
- 413 Clay, P. A., K. Dhir, V. H. W. Rudolf, and M. A. Duffy. 2018. Within-host priority effects  
414 systematically alter pathogen coexistence. *The American Naturalist* 193:187–199.
- 415 Dordas, C. 2009. Role of Nutrients in Controlling Plant Diseases in Sustainable Agriculture: A  
416 Review. Pages 443–460 in E. Lichtfouse, M. Navarrete, P. Debaeke, S. Véronique, and C.  
417 Alberola, editors. *Sustainable Agriculture*. Springer, Dordrecht, Netherlands.
- 418 Ezenwa, V. O., and A. E. Jolles. 2011. From host immunity to pathogen invasion: The effects of  
419 helminth coinfection on the dynamics of microparasites. *Integrative and Comparative*  
420 *Biology* 51:540–551.
- 421 Froissart, R., J. Doumayrou, F. Vuillaume, S. Alizon, and Y. Michalakis. 2010. The virulence-  
422 transmission trade-off in vector-borne plant viruses: a review of (non-)existing studies.  
423 *Philosophical Transactions of the Royal Society B* 365:1907–1918.
- 424 Gilchrist, M. A., and D. Coombs. 2006. Evolution of virulence: interdependence, constraints, and  
425 selection using nested models. *Theoretical Population Biology* 69:145–53.
- 426 Gray, S., A. Power, D. Smith, A. J. Seaman, and N. S. Altman. 1991. Aphid transmission of  
427 barley yellow dwarf virus: Acquisition access periods and virus concentration requirements.  
428 *Phytopathology* 81:539–545.

- 429 Halliday, F. W., J. Umbanhowar, and C. E. Mitchell. 2017. Interactions among symbionts  
430 operate across scales to influence parasite epidemics. *Ecology Letters* 20:1285–1294.
- 431 Handel, A., and P. Rohani. 2015. Crossing the scale from within-host infection dynamics to  
432 between-host transmission fitness: a discussion of current assumptions and knowledge.  
433 *Philosophical Transactions of the Royal Society B* 370:20140302.
- 434 Hoagland, D. R., and D. I. Arnon. 1938. The water culture method for growing plants without  
435 soil. *California Agricultural Experiment Station Circular* 347:32.
- 436 Katona, P., and J. Katona-Apte. 2008. The interaction between nutrition and infection. *Clinical*  
437 *Infectious Diseases* 46:1582–1588.
- 438 Lacroix, C., E. W. Seabloom, and E. T. Borer. 2014. Environmental nutrient supply alters  
439 prevalence and weakens competitive interactions among coinfecting viruses. *The New*  
440 *Phytologist* 204:424–433.
- 441 Lacroix, C., E. W. Seabloom, and E. T. Borer. 2017. Environmental nutrient supply directly  
442 alters plant traits but indirectly determines virus growth rate. *Frontiers in Microbiology*  
443 8:2116.
- 444 Lange, B., M. Reuter, D. Ebert, K. Muylaert, and E. Decaestecker. 2014. Diet quality determines  
445 interspecific parasite interactions in host populations. *Ecology and Evolution* 4:3093–3102.
- 446 Liu, Y., H. Zhai, K. Zhao, B. Wu, and X. Wang. 2012. Two suppressors of RNA silencing  
447 encoded by cereal-infecting members of the family Luteoviridae. *Journal of General*  
448 *Virology* 93:1825–1830.
- 449 Mackay, I. M., K. E. Arden, and A. Nitsche. 2002. Real-time PCR in virology. *Nucleic acids*  
450 *research* 30:1292–305.
- 451 Maestre, F. T., and J. Cortina. 2004. Do positive interactions increase with abiotic stress? A test

- 452 from a semi-arid steppe. *Proceedings: Biological Sciences* 271:179–182.
- 453 McCallum, H., A. Fenton, P. J. Hudson, B. Lee, B. Levick, R. Norman, S. E. Perkins, M. Viney,  
454 A. J. Wilson, and J. Lello. 2017. Breaking beta: Deconstructing the parasite transmission  
455 function. *Philosophical Transactions of the Royal Society B: Biological Sciences* 372.
- 456 Mideo, N., S. Alizon, and T. Day. 2008. Linking within- and between-host dynamics in the  
457 evolutionary epidemiology of infectious diseases. *Trends in Ecology & Evolution* 23:511–7.
- 458 Miller, T. E., J. H. Burns, P. Munguia, E. L. Walters, J. M. Kneitel, P. M. Richards, N. Mouquet,  
459 and H. L. Buckley. 2005. A critical review of twenty years’ use of the resource-ratio theory.  
460 *The American Naturalist* 165:439–448.
- 461 Moreno, A. B., and J. J. López-Moya. 2020. When viruses play team sports: Mixed infections in  
462 plants. *Phytopathology* 110:29–48.
- 463 Nowak, H., and E. Komor. 2010. How aphids decide what is good for them: experiments to test  
464 aphid feeding behaviour on *Tanacetum vulgare* (L.) using different nitrogen regimes.  
465 *Oecologia* 163:973–984.
- 466 Pedersen, A. B., and A. Fenton. 2007. Emphasizing the ecology in parasite community ecology.  
467 *Trends in Ecology & Evolution* 22:133–139.
- 468 Power, A. G., E. T. Borer, P. Hosseini, C. E. Mitchell, and E. W. Seabloom. 2011. The  
469 community ecology of barley/cereal yellow dwarf viruses in Western US grasslands. *Virus*  
470 *Research* 159:95–100.
- 471 R Core Team. 2018. R: A language and environment for statistical computing. R Foundation for  
472 Statistical Computing, Vienna, Austria.
- 473 Rochow, W., I. Muller, and F. Gildow. 1983. Interference between two luteoviruses in an aphid:  
474 lack of reciprocal competition. *Phytopathology* 73:919–922.

- 475 de Roode, J. C., R. Culleton, S. J. Cheesman, R. Carter, and A. F. Read. 2004. Host  
476 heterogeneity is a determinant of competitive exclusion or coexistence in genetically  
477 diverse malaria infections. *Proceedings of the Royal Society B* 271:1073–1080.
- 478 Seabloom, E. W., C. D. Benfield, E. T. Borer, A. G. Stanley, T. N. Kaye, and P. W. Dunwiddie.  
479 2011. Provenance, life span, and phylogeny do not affect grass species' responses to  
480 nitrogen and phosphorus. *Ecological Applications* 21:2129–2142.
- 481 Seabloom, E. W., E. T. Borer, K. Gross, A. E. Kendig, C. E. Mitchell, E. A. Mordecai, and A. G.  
482 Power. 2015. The community ecology of pathogens: coinfection, coexistence and  
483 community composition. *Ecology Letters* 18:401–415.
- 484 Seabloom, E. W., E. T. Borer, C. Lacroix, C. E. Mitchell, and A. G. Power. 2013. Richness and  
485 composition of niche-assembled viral pathogen communities. *PLoS ONE* 8:e55675.
- 486 Smith, V. H., and R. D. Holt. 1996. Resource competition and within-host disease dynamics.  
487 *Trends in Ecology & Evolution* 11:386–389.
- 488 Smith, V., T. Jones, and M. Smith. 2005. Host nutrition and infectious disease: an ecological  
489 view. *Frontiers in Ecology and the Environment* 3:268–274.
- 490 Soetaert, K., T. Petzoldt, and R. W. Setzer. 2010. Solving differential equations in R: Package  
491 deSolve. *Journal of Statistical Software* 33:1–25.
- 492 Srinivasan, R., and J. M. Alvarez. 2007. Effect of mixed viral infections (potato virus Y-potato  
493 leafroll virus) on biology and preference of vectors *Myzus persicae* and *Macrosiphum*  
494 *euphorbiae* (Hemiptera: Aphididae). *Journal of Economic Entomology* 100:646–655.
- 495 Strauss, A. T., L. G. Shoemaker, E. W. Seabloom, and E. T. Borer. 2019. Cross-scale dynamics  
496 in community and disease ecology: relative timescales shape the community ecology of  
497 pathogens. *Ecology*:e02836.

- 498 Susi, H., B. Barrès, P. F. Vale, and A. L. Laine. 2015a. Co-infection alters population dynamics  
499 of infectious disease. *Nature Communications* 6:1–8.
- 500 Susi, H., P. F. Vale, and A. L. Laine. 2015b. Host genotype and coinfection modify the  
501 relationship of within and between host transmission. *American Naturalist* 186:252–263.
- 502 Tilman, D. 1977. Resource competition between plankton algae: An experimental and theoretical  
503 approach. *Ecology* 58:338–348.
- 504 Tollenaere, C., H. Susi, and A.-L. Laine. 2016. Evolutionary and epidemiological implications of  
505 multiple infection in plants. *Trends in Plant Science* 21:80–90.
- 506 Vasco, D. A., H. J. Wearing, and P. Rohani. 2007. Tracking the dynamics of pathogen  
507 interactions: modeling ecological and immune-mediated processes in a two-pathogen  
508 single-host system. *Journal of Theoretical Biology* 245:9–25.
- 509 Wale, N., D. G. Sim, M. J. Jones, R. Salathe, T. Day, and A. F. Read. 2017. Resource limitation  
510 prevents the emergence of drug resistance by intensifying within-host competition.  
511 *Proceedings of the National Academy of Sciences of the United States of America*  
512 114:13774–13779.
- 513 Wen, F., and R. M. Lister. 1991. Heterologous encapsidation in mixed infections among four  
514 isolates of barley yellow dwarf virus. *Journal of General Virology* 72:2217–2223.
- 515 Whitaker, B. K., M. A. Rúa, and C. E. Mitchell. 2015. Viral pathogen production in a wild grass  
516 host driven by host growth and soil nitrogen. *New Phytologist* 207:760–768.
- 517 Wilkinson, T. L., R. Koga, and T. Fukatsu. 2007. Role of host nutrition in symbiont regulation:  
518 Impact of dietary nitrogen on proliferation of obligate and facultative bacterial  
519 endosymbionts of the pea aphid *Acyrtosiphon pisum*. *Applied and Environmental*  
520 *Microbiology* 73:1362–1366.

521 **Data availability:** Data and code are publicly available on the Environmental Data Initiative

522 Data Portal: <https://doi.org/10.6073/pasta/01e7bf593676a942f262623710acba13>



523 **Table 1.** Model estimates and 95% credible intervals (CI) for statistical models of log-  
524 transformed virus density.

| Predictor          | PAV      |            | RPV      |            |
|--------------------|----------|------------|----------|------------|
|                    | Estimate | 95% CI     | Estimate | 95% CI     |
| co-inoculation     | 0.64*    | 0.06–1.22  | 0.31     | -0.36–0.97 |
| N addition (N)     | 0.17     | -0.36–0.69 | 0.03     | -0.60–0.67 |
| P addition (P)     | -0.03    | -0.54–0.47 | 0.40     | -0.29–1.10 |
| co-inoculation:N   | -0.61    | -1.36–0.14 | 0.33     | -0.58–1.21 |
| co-inoculation:P   | -0.39    | -1.12–0.35 | -0.83    | -1.82–0.14 |
| N:P                | -0.01    | -0.72–0.70 | 0.05     | -0.91–0.98 |
| co-inoculation:N:P | -0.04    | -1.01–0.93 | 0.51     | -0.84–1.85 |

525 Note: Asterisk indicates estimate has 95% CI that do not include zero, which suggests that “no  
526 effect” is absent from the most probable estimate values.

527

528 **Table 2.** Model estimates and 95% credible intervals (CI) for statistical models of virus  
 529 transmission.

| Predictor                                                 | PAV      |             | RPV      |            |
|-----------------------------------------------------------|----------|-------------|----------|------------|
|                                                           | Estimate | 95% CI      | Estimate | 95% CI     |
| density                                                   | 0.82     | 0.52–1.28   | 1.30*    | 1.03–1.63  |
| co-infection                                              | 0.68     | 0.14–2.99   | 0.84     | 0.46–1.56  |
| N addition to source ( $N_{\text{source}}$ )              | 1.72     | 0.72–4.15   | 0.92     | 0.54–1.60  |
| P addition to source ( $P_{\text{source}}$ )              | 0.83     | 0.35–1.91   | 1.60     | 0.85–3.04  |
| N addition to recipient ( $N_{\text{recipient}}$ )        | 0.75     | 0.20–2.83   | 2.81*    | 1.25–6.69  |
| P addition to recipient ( $P_{\text{recipient}}$ )        | 0.18*    | 0.05–0.57   | 1.33     | 0.64–2.86  |
| $N_{\text{source}}:P_{\text{source}}$                     | 0.79     | 0.24–2.53   | 0.66     | 0.29–1.49  |
| $N_{\text{recipient}}:P_{\text{recipient}}$               | 8.88*    | 1.35–64.55  | 0.9      | 0.26–3.12  |
| density: $N_{\text{source}}$                              | 2.01     | 0.95–5.13   | 0.77     | 0.22–2.56  |
| density: $P_{\text{source}}$                              | 2.72     | 0.84–10.55  | 1.19     | 0.70–2.26  |
| density: $N_{\text{recipient}}$                           | 1.36     | 0.50–4.95   | 0.78     | 0.47–1.38  |
| density: $P_{\text{recipient}}$                           | 0.44*    | 0.17–0.95   | 0.68     | 0.41–1.10  |
| co-infection: $N_{\text{source}}$                         | 0.22*    | 0.05–0.93   | 1.87     | 0.90–3.85  |
| co-infection: $P_{\text{source}}$                         | 0.63     | 0.14–2.72   | 0.82     | 0.37–1.79  |
| co-infection: $N_{\text{recipient}}$                      | 1.74     | 0.35–8.54   | 0.87     | 0.29–2.60  |
| co-infection: $P_{\text{recipient}}$                      | 8.60*    | 2.00–41.27  | 0.77     | 0.29–1.99  |
| density: $N_{\text{source}}:P_{\text{source}}$            | 0.13     | 0.01–1.50   | 0.63     | 0.15–2.49  |
| density: $N_{\text{recipient}}:P_{\text{recipient}}$      | 7.24     | 0.88–110.44 | 4.27*    | 1.57–15.61 |
| co-infection: $N_{\text{source}}:P_{\text{source}}$       | 1.71     | 0.27–11.02  | 1.21     | 0.41–3.66  |
| co-infection: $N_{\text{recipient}}:P_{\text{recipient}}$ | 0.17     | 0.02–1.58   | 0.81     | 0.16–4.16  |

530 Note: Asterisk indicates estimate (odds ratios) has 95% CI that do not include one, which

531 suggests that “no effect” is absent from the most probable estimate values.

532

533

## Figure legends

534

**Figure 1.** Diagram of the experimental design. (a) Source plants were grown in one of four

535

nutrient treatments and inoculated with one of three inoculation treatments. (b) Source plants

536

were harvested at eight different time points and tissue was cut into pieces. (c) Tissue was used

537

in molecular analysis to determine virus establishment and density. (d) Tissue was placed in

538

tubes with aphids, which were used to inoculate recipient plants and assess transmission.

539

**Figure 2.** The effects of nutrients and co-inoculation on (a, b) establishment (proportion of

540

source plants infected) and (e, f) log-transformed density (viruses per mg plant tissue) of (a, e)

541

PAV and (b, f) RPV over time (mean  $\pm$  95% nonparametric bootstrap confidence intervals).

542

Linear regression estimates of (c, g) PAV and (d, h) RPV (c, d) establishment and (g, h) log-

543

transformed density (mean  $\pm$  95% credible intervals).

544

**Figure 3.** The effects of source plant nutrition and infection status on (a) PAV and (b) RPV

545

transmission (proportion of recipient plants infected) over time, averaged over recipient plant

546

nutrient treatments (mean  $\pm$  95% nonparametric bootstrap confidence intervals; see Appendix

547

S2: Fig. S2 for averages over source plants). Regression relationships between transmission and

548

log-transformed virus density for (c) PAV (d) RPV. Vertical lines indicate overall average log-

549

transformed density for each virus. Regression estimates of (e) PAV and (f) RPV transmission

550

(mean  $\pm$  95% credible intervals) were taken at the average virus density for each treatment.

551

**Figure 4.** The predicted change in prevalence of (a–c) PAV and (d–f) RPV due to the presence

552

of the other virus in simulated plant populations grown with low nutrients, N addition, P

553

addition, or both nutrients. Initial host population sizes were  $I_P = 1$  (when PAV was present),  $I_R$

554

$= 1$  (when RPV was present),  $I_C = 0$ ,  $N = 4,000$ . Parameter values represent transmission that (b,

555

e) depends on virus density, (c, f) is independent of virus density, or (a, d) both.

556 **Figure 1**

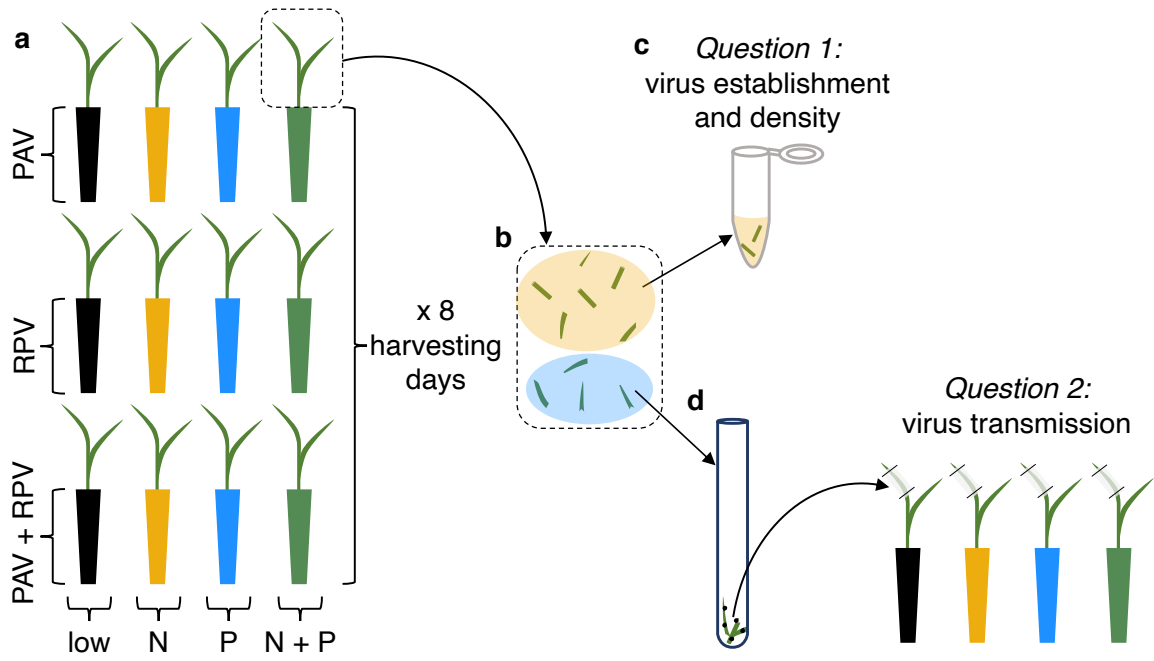

557

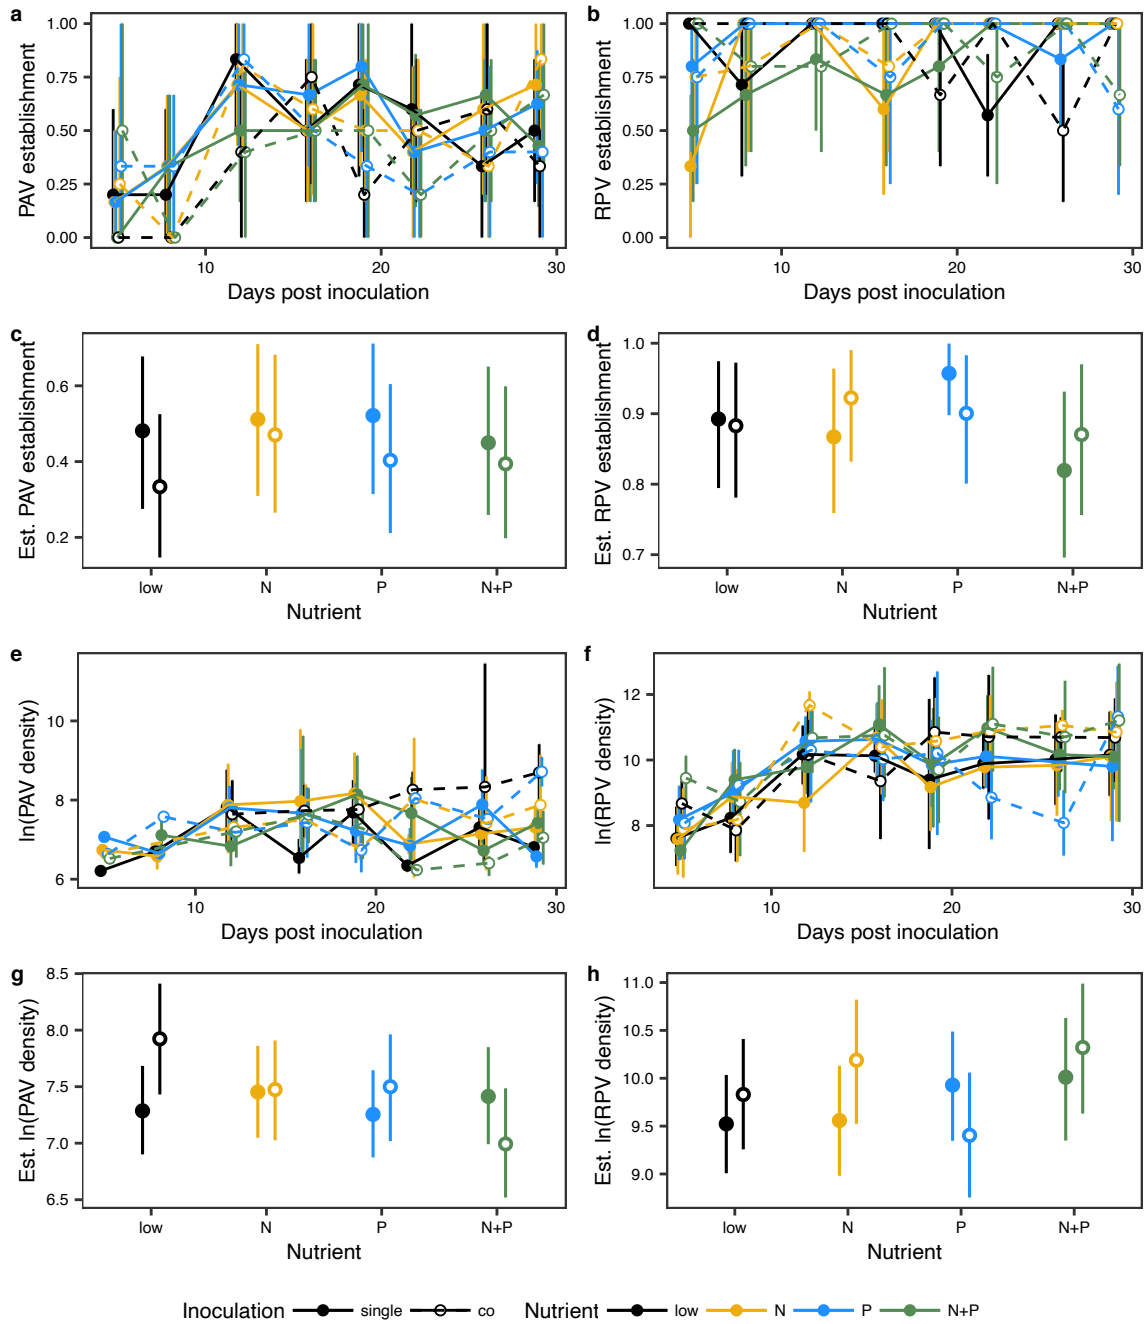

560 **Figure 3**

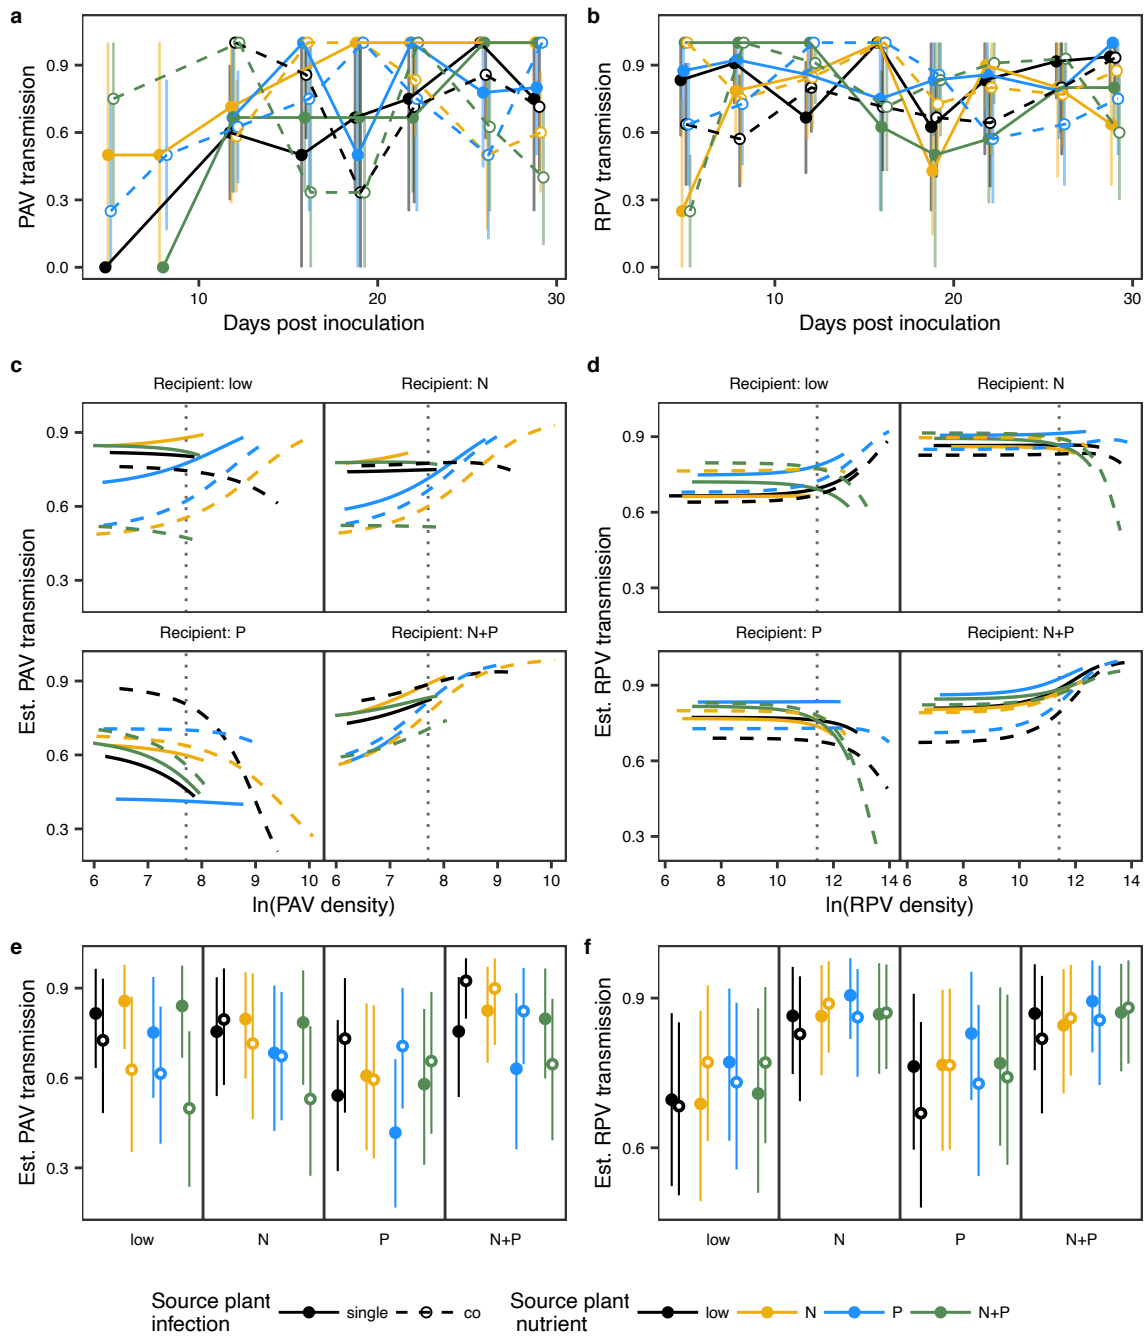

561

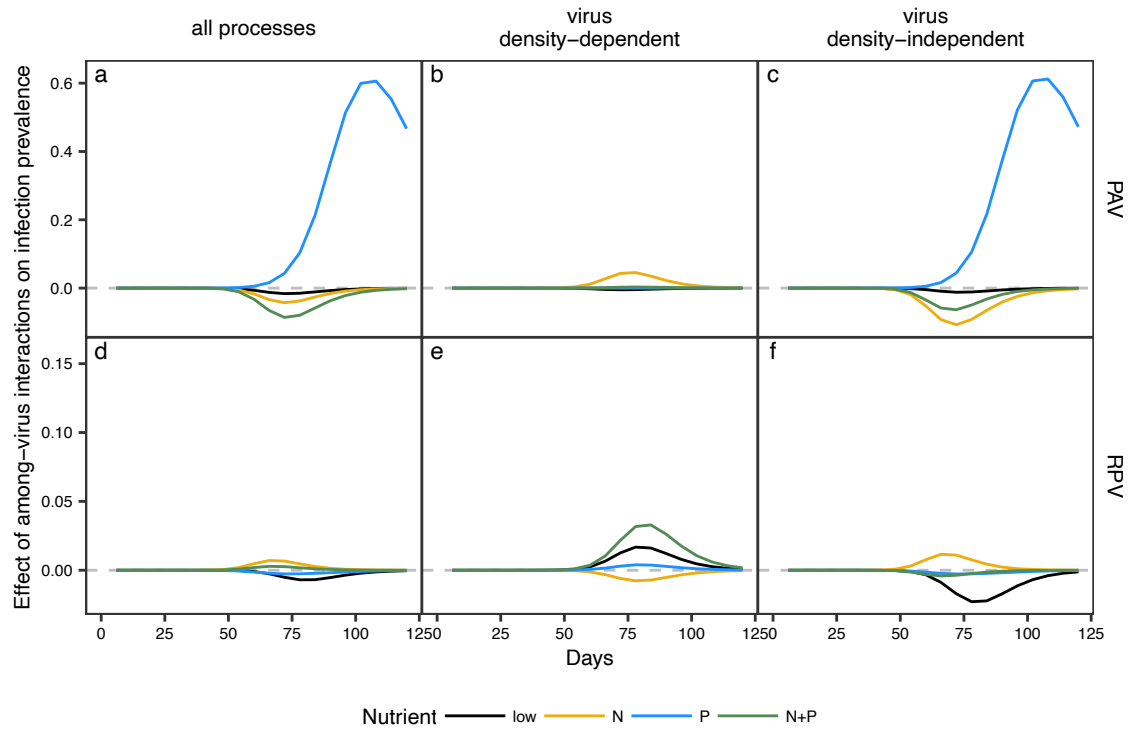

Source: https://www.biorxiv.org/content/10.1101/761254v2.full.pdf
